# Supplementary material
Source: bioRxiv or medRxiv preprint supplement (https://www.biorxiv.org/highwire/filestream/103590/field_highwire_adjunct_files/1/209874-2.pdf)
Supplement: Supplementary file [file 209874-2.pdf]

| Target Gene | Construct | Line | Target Position | Mutation Zygosity | Genotype                                 | Effect                                         |
|-------------|-----------|------|-----------------|-------------------|------------------------------------------|------------------------------------------------|
| nCBP-1      | BS01      | 1    | 133             | Homozygous        | d3                                       | Frameshift                                     |
|             |           | 3    | 133             | Chimeric          | d4, i1, d1, d2                           | Frameshift, Frameshift, Frameshift, Frameshift |
|             |           | 4    | 133             | Bi-allelic        | d3, d9                                   | Frameshift, Frameshift                         |
|             |           | 5    | 133             | WT                | WT                                       | No effect                                      |
|             |           | 6    | 133             | Homozygous        | i1                                       | Frameshift                                     |
|             |           | 7    | 133             | Chimeric          | d4, d1, d19, d34i16                      | Frameshift, Frameshift, Frameshift, Frameshift |
|             |           | 2    | 2677            | WT                | WT                                       | No effect                                      |
|             | BS03      | 3    | 2677            | Homozygous        | d9                                       | Frameshift                                     |
|             |           | 4    | 2677            | Bi-allelic        | i3d2, i1                                 | Frameshift, No effect                          |
|             |           | 5    | 2677            | Homozygous        | i1                                       | No effect                                      |
|             |           | 6    | 2677            | Homozygous        | d1                                       | Frameshift                                     |
| 7           |           | 2677 | Bi-allelic      | d3, i1            | 1 AA deleted and 1 AA changed, No effect |                                                |
| 8           |           | 2677 | Bi-allelic      | d12, i1           | Frameshift, No effect                    |                                                |
| 9           |           | 2677 | Homozygous      | i1                | No effect                                |                                                |
| 10          |           | 2677 | Bi-allelic      | d93i2, d2         | Frameshift, Frameshift                   |                                                |
| 11          |           | 2677 | Bi-allelic      | d5, d1            | Frameshift, Frameshift                   |                                                |
| nCBP-2      |           | BS02 | 1               | 148               | Chimeric                                 | d3, d6, d7, i2d8                               |
|             | 2         |      | 148             | Bi-allelic        | d5, d2                                   | Frameshift, Frameshift                         |
|             | 4         |      | 148             | Bi-allelic        | i4d127, i8d20                            | Frameshift, Frameshift                         |
|             | 5         |      | 148             | Chimeric          | d17, d52, d1, i2d4                       | Frameshift, Frameshift, Frameshift, Frameshift |
|             | 6         |      | 148             | Homozygous        | d1                                       | Frameshift                                     |
|             | 7         |      | 148             | Bi-allelic        | d1, d17                                  | Frameshift, Frameshift                         |
|             | 1         |      | 2763            | Heterozygous      | WT, i1                                   | No effect, Frameshift                          |
|             | BS04      | 2    | 2763            | Bi-allelic        | i1, d7                                   | Frameshift, Frameshift                         |
|             |           | 3    | 2763            | Chimeric          | i1, d7, d4                               | Frameshift, Frameshift, Frameshift             |
|             |           | 4    | 2763            | Bi-allelic        | d4, i1                                   | Frameshift, Frameshift                         |
|             |           | 5    | 2763            | Bi-allelic        | d2, d6                                   | Frameshift, 2 AA deletion                      |
|             |           | 6    | 2763            | WT                | WT                                       | No effect                                      |
|             |           | 8    | 2763            | Homozygous        | i1                                       | Frameshift                                     |
|             |           | 9    | 2763            | Bi-allelic        | d2, d7                                   | Frameshift, Frameshift                         |
|             |           | 10   | 2763            | Bi-allelic        | i1d8, d2                                 | Frameshift, Frameshift                         |
|             |           | 11   | 2763            | Bi-allelic        | d2, i1d10                                | Frameshift, Frameshift                         |
| 12          |           | 2763 | Bi-allelic      | d5, d11           | Frameshift, Frameshift                   |                                                |
| nCBP-1/2    | BS05      | 1    | 148             | Bi-allelic        | d7, d1                                   | Frameshift, Frameshift                         |
|             |           | 1    | 133             | Bi-allelic        | d2, d4                                   | Frameshift, Frameshift                         |
|             |           | 2    | 148             | Homozygous        | d11                                      | Frameshift                                     |
|             |           | 2    | 133             | Homozygous        | i1                                       | Frameshift                                     |
|             |           | 3    | 148             | Bi-allelic        | i1, d1                                   | Frameshift, Frameshift                         |
|             |           | 3    | 133             | Bi-allelic        | d1, d5                                   | Frameshift, Frameshift                         |
|             |           | 4    | 148             | Bi-allelic        | d5, d4                                   | Frameshift, Frameshift                         |
|             |           | 4    | 133             | Bi-allelic        | d2, d1                                   | Frameshift, Frameshift                         |
| 5           |           | 148  | Bi-allelic      | i1, d6            | Frameshift, Frameshift                   |                                                |
| 5           |           | 133  | Bi-allelic      | d4, d9            | Frameshift, Frameshift                   |                                                |
| 6           |           | 148  | WT              | WT                | No effect                                |                                                |
| 6           |           | 133  | WT              | WT                | No effect                                |                                                |
| 7           |           | 148  | Bi-allelic      | i1, d15           | Frameshift, Frameshift                   |                                                |
| 7           |           | 133  | Bi-allelic      | d3, d5            | Frameshift, Frameshift                   |                                                |
| 8           |           | 148  | Homozygous      | d1                | Frameshift                               |                                                |
| 8           |           | 133  | Bi-allelic      | d3, d1            | Frameshift, Frameshift                   |                                                |

Table S1. Genotypes of all transgenic T<sub>0</sub> cassava lines.

WT, wild-type alleles; bi-allelic, two different mutated alleles; heterozygous, wild-type and mutated alleles; chimeric, more than two mutated alleles. d# and i# refer to deletions and insertions, respectively, with the number of bases mutated denoted by #. Highlighted transgenic events were used in CBSV/UCBSV challenge assays.
